# Supplementary material for: Electroacupuncture Ameliorates Endometriosis-Associated Ovarian Dysfunction by Activating Nrf2 Pathway to Upregulate GPX4 Function and Inhibiting Ferroptosis
Source: Research Square preprint supplement (doi:10.21203/rs.3.rs-6928457/v1), 2025-06-25
Supplement: Supplementary file 1 [file 9038e14f483751797f65ca59.docx]

**Table 1 Primer sequences**

| **Gene name** | **Forward primer (5'->3')** | **Reverse primer (5'->3')** |
| --- | --- | --- |
| *Gapdh* | AACTTTGGCATTGTGGAAGGG | GACACATTGGGGGTAGGAACA |
| *Slc7a11* | GGGTCTCGATTACCATTCCCG | TCAGCACAAACATTGACCCA |
| *Hmox1* | GAACCCAGTCTATGCCCCAC | GGCGTGCAAGGGATGATTTC |
| *Nqo1* | TAGCCTGTAGCCAGCCCTAA | GCCTCCTTCATGGCGTAGTT |
| *Fth1* | AAGTGCGCCAGAACTACCAC | AGCCACATCATCTCGGTCAA |
| *Gpx4* | GCCTCGCAATGAGGCAAAAC | CAAACTGGTTGCAGGGGAAG |
| *Acsl4* | GCTATGACGCCCCTCTTTGT | GAATCGGTGTGTCTGAGGGG |
| *Ptgs2* | CAGGACTCTGCTCACGAAGG | ATCCAGTCCGGGTACAGTCA |
| *Sod2* | GAGAGCAGCGGTCGTGTAAA | AGCCTCGTGGTACTTCTCCT |
| *Nrf2* | AGAGTGATGGTTGCCCACTT | GCGTGCTCAGAAACCTCCTT |

**Table 2 Antibody type and application**

| **Antibody name** | **Company** | **Catalog Number** | **Reactivity** | **Dilution** |
| --- | --- | --- | --- | --- |
| Gapdh Antibody | CST | 5174 | M, H, R | WB 1:2000 |
| FTH1 Antibody | ABclonal | A25458PM | M, H, R | WB 1:1000 |
| GPX4 Antibody | Proteintech | 67763-1-Ig | M, H, R | WB 1:4000 |
| COX-2 Antibody | ABclonal | A3560 | M, H, R | WB 1:6000 |
| ACSL4 Antibody | ABclonal | A20414 | M, H, R | WB 1:58000 |
