# Supplementary material for: Electroacupuncture Ameliorates Endometriosis-Associated Ovarian Dysfunction by Activating Nrf2 Pathway to Upregulate GPX4 Function and Inhibiting Ferroptosis
Source: Research Square preprint supplement (doi:10.21203/rs.3.rs-6928457/v1), 2025-06-25
Supplement: Supplementary file 2 [file f534f0c2d9328b6a49c670ec.docx]

**Full uncropped Gels and Blots image(s)**

| **GPX4** |  |
| --- | --- |
| **Figure1** | **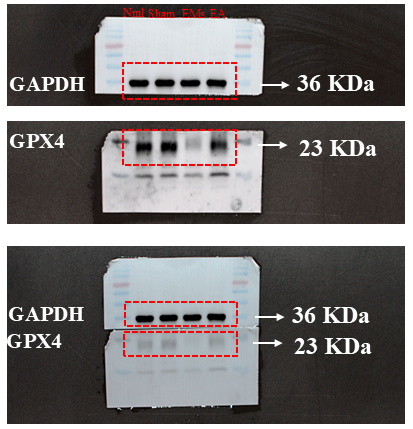** |
| **Figure2** | **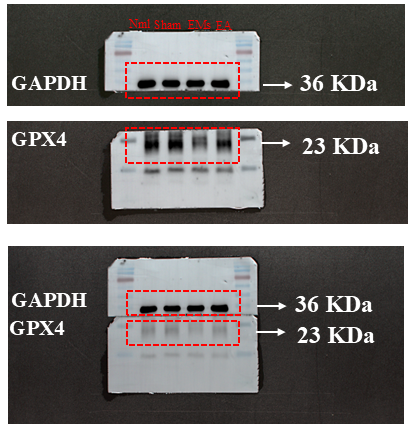** |
| **Figure3** | **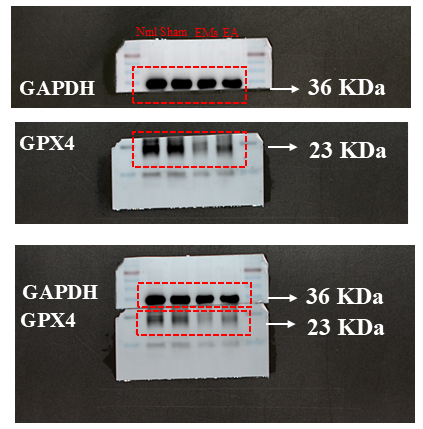** |
| **Figure4** | **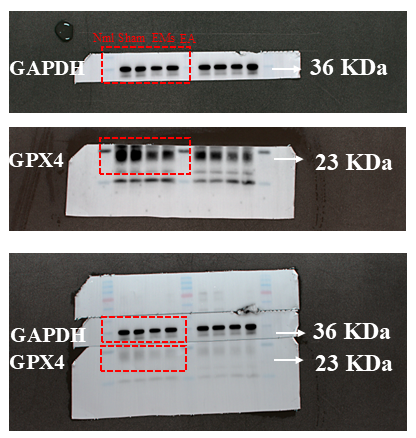** |
| **FTH1** |  |
| **Figure1** | **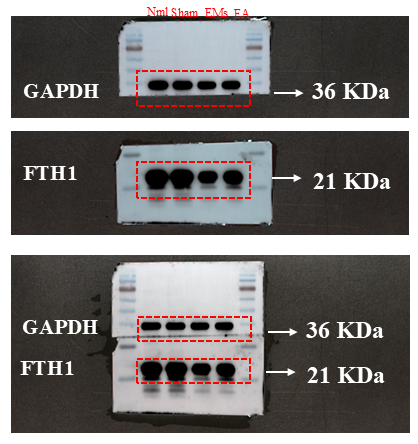** |
| **Figure2** | **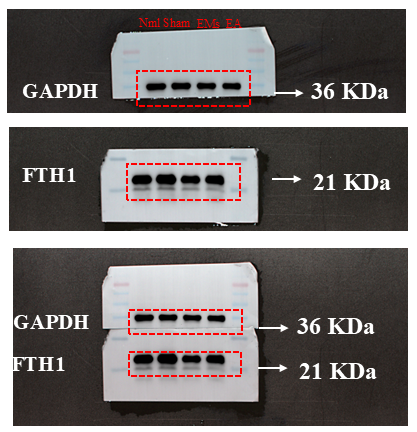** |
| **Figure3** | **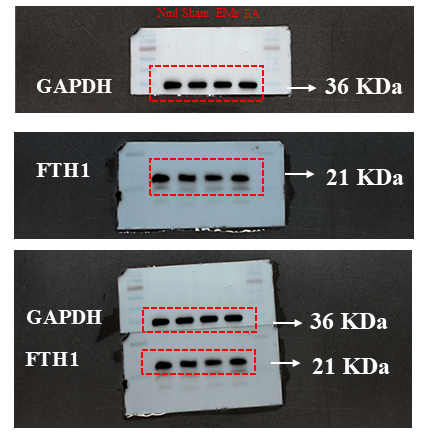** |
| **Figure4** | **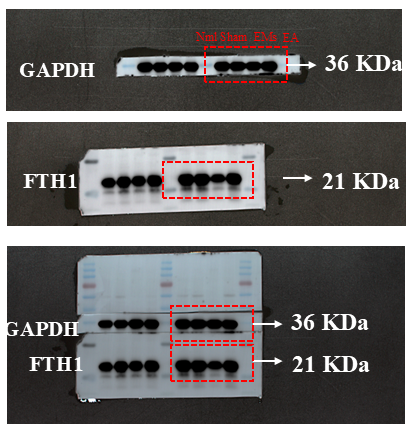** |
| **ACSL4** |  |
| **Figure1** | **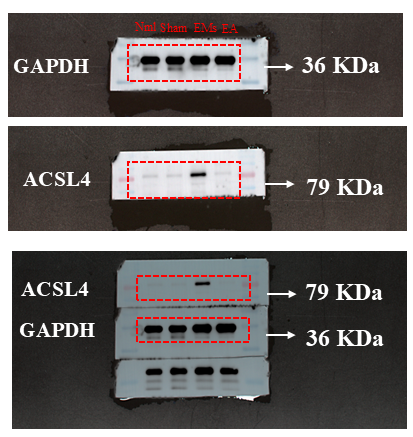** |
| **Figure2** | **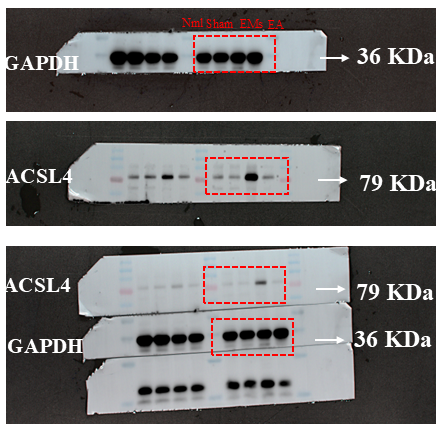** |
| **Figure3** | **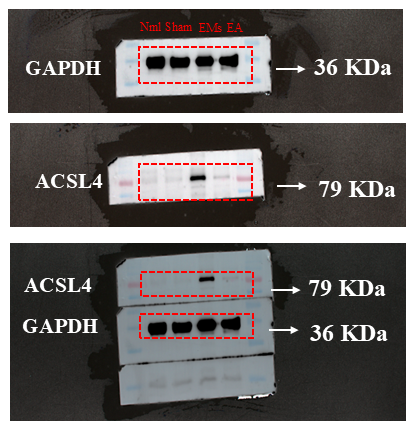** |
| **Figure4** | **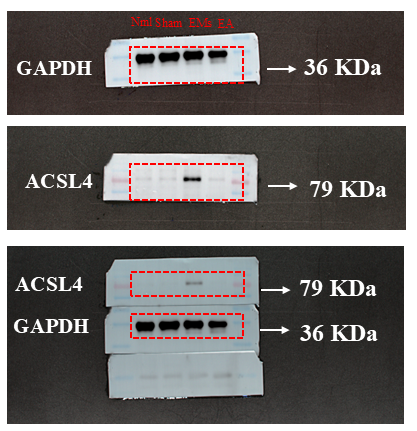** |
| **COX-2** |  |
| **Figure1** | **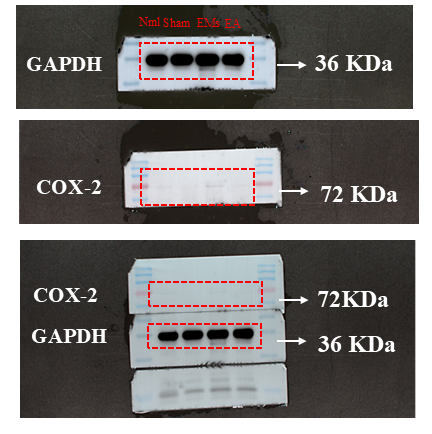** |
| **Figure2** | **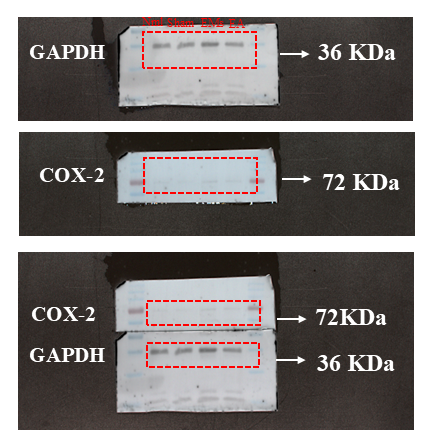** |
| **Figure3** | **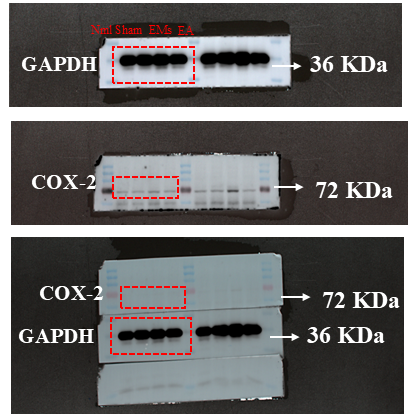** |
| **Figure4** | **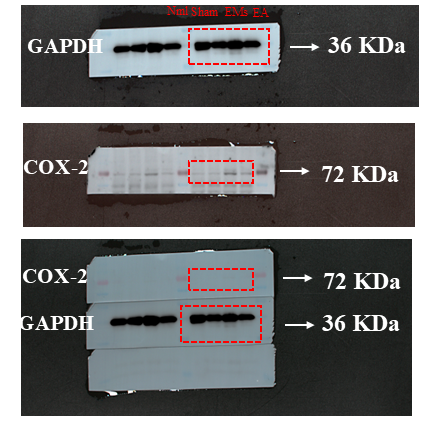** |
